# Supplementary material for: Machine Learning-based Approaches for Identifying Human Cells Harboring Fetal Chromatin Domain Ablations
Source: Research Square preprint supplement (doi:10.21203/rs.3.rs-906377/v1), 2021-09-22
Supplement: Supplementary file 1 [file c98a534eea3385e20cd60f1a.xlsx]

## Sheet: test1
number of nodes in 1st layer	number of nodes in 2nd layer	m00	m01	m10	m11	FCD-HT precision	FCD-HT recall	FCD-HT f-value	KU-812 precision	KU-812 recall	KU-812 f-value	accuracy	AUC
20	26	32503	6089	7306	29766	0.830177	0.802924	0.816323	0.816474	0.842221	0.829148	0.822967	0.903213
26	18	32499	6093	7281	29791	0.830203	0.803598	0.816684	0.816968	0.842118	0.829352	0.823245	0.903196
30	26	32279	6313	7141	29931	0.825819	0.807375	0.816493	0.818848	0.836417	0.827539	0.822188	0.903234
