# Supplementary material for: Machine Learning-based Approaches for Identifying Human Cells Harboring Fetal Chromatin Domain Ablations
Source: Research Square preprint supplement (doi:10.21203/rs.3.rs-906377/v1), 2021-09-22
Supplement: Supplementary file 2 [file ef9971029e7dec95a31aac92.xlsx]

## Sheet: test1
Architecture	m00	m01	m10	m11	FCD-HT precision	FCD-HT recall	FCD-HT f-value	KU-812 precision	KU-812 recall	KU-812 f-value	accuracy	AUC
Type 1 Depth 2 (T1D2)	79	82	68	104	0.55914	0.604651	0.581006	0.537415	0.490683	0.512987	0.54955	0.553933
Type 1 Depth 4 (T1D4)	97	64	45	127	0.664921	0.738372	0.699725	0.683099	0.602484	0.640264	0.672673	0.697783
Type 1 Depth 6 (T1D6)	76	85	94	78	0.478528	0.453488	0.465672	0.447059	0.47205	0.459215	0.462462	0.500469
Type 2 Depth 2 (T2D2)	94	67	55	117	0.63587	0.680233	0.657303	0.630872	0.583851	0.606452	0.633634	0.529684
Type 2 Depth 3 (T2D3)	103	58	53	119	0.672316	0.69186	0.681948	0.660256	0.639752	0.649842	0.666667	0.642514
Type 2 Depth 4 (T2D4)	106	55	35	137	0.713542	0.796512	0.752747	0.751773	0.658385	0.701987	0.72973	0.73653
Type 2 Depth 5 (T2D5)	136	25	42	130	0.83871	0.755814	0.795107	0.764045	0.84472	0.80236	0.798799	0.874621
